# Supplementary material for: Arte en la tierra: poesía visual en las tierras de Santa Lucía
Source: Royal Society of Chemistry journal article supplement (doi:10.1039/d2ra07660h), 2007-01-01
Supplement: d2ra07660h6.pdf [file d2ra07660h6.pdf]

## Supporting Information

### Experimental and Theoretical Studies on the Extraction

### Behavior of Cf(III) by NTAamide(C8) Ligand and the

### Seperation of Cf(III)/Cm(III)

Yi-lin Wang,<sup>a</sup> Feng-feng Li,<sup>a</sup> Zhe Xiao,<sup>a</sup> Cong-zhi Wang,<sup>b</sup> Yang Liu,<sup>b</sup> Hui He,<sup>\* a</sup> and

Wei-qun Shi<sup>\* b</sup>

<sup>a</sup> Department of Radiochemistry, China Institute of Atomic Energy, Beijing 102413,  
P.R.China

<sup>b</sup> Laboratory of Nuclear Energy Chemistry, Institute of High Energy Physics, Chinese  
Academy of Sciences, Beijing 100049, P.R.China

#### Corresponding Authors

\*E-mail: hehui@ciae.ac.cn

## 1. Concentration of Cf<sup>3+</sup>

The Cf<sup>3+</sup> concentration in the solution can be calculated from the liquid scintillation number and the following formula:

$$\lambda = \frac{\ln 2}{t_{1/2}} \quad (1)$$

$$N = \frac{A}{\lambda} \quad (2)$$

$$n = \frac{N}{N_A} \quad (3)$$

**Table S1.** Nuclear properties of <sup>252</sup>Cf and its decay daughter <sup>248</sup>Cm

| Nuclide           | Half-life (year)    | Radioactivity (Ci /g) | Spontaneous fission half-life(year) | Fission fraction (%) | Spontaneous fission yield (n s-1 g-1) |
|-------------------|---------------------|-----------------------|-------------------------------------|----------------------|---------------------------------------|
| <sup>252</sup> Cf | 2.645               | 5.38×10 <sup>2</sup>  | 85                                  | 3.09                 | 2.3×10 <sup>12</sup>                  |
| <sup>248</sup> Cm | 3.4×10 <sup>5</sup> | 4.25×10 <sup>-3</sup> | 41                                  | 8.39                 | 1.2×10 <sup>7</sup>                   |

After liquid scintillation measurement and deducting the background, the radioactivity of the Cf(III) solution used in the experiment was about 800 cpm, and the radioactivity of the Cf(III) solution obtained after stripping was 910 cpm.

After calculation, the Cf(III) concentration in the solution is about 9.60×10<sup>-8</sup>mol/L, and the concentration of Cf(III) solution obtained after stripping is 1.09×10<sup>-7</sup>mol/L.

## 2. The electrostatic potential (ESP) of NTAamide(C8)

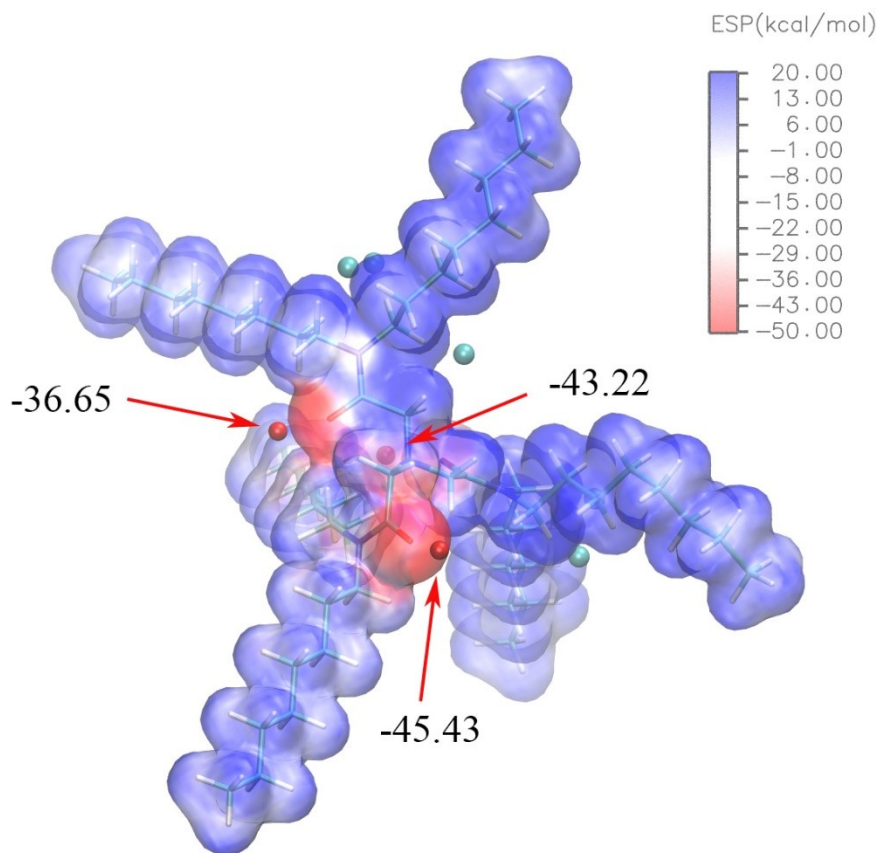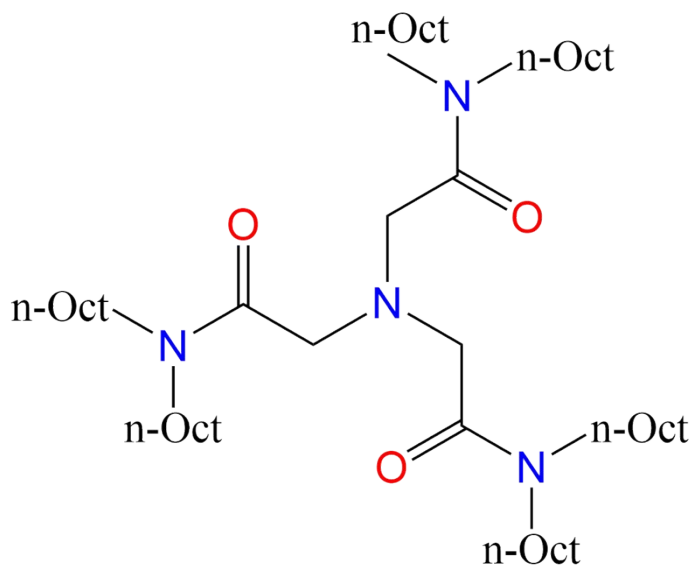

**Figure S1.** The maps of ESP and structure of NTAamide(C8).

### 3. Mulliken population analysis (MPA)

**Table S2.** Differences in charge transfer of metal ions with complexes and trivalent metal ions calculated from Mulliken charges

| Species                                            | $\Delta Q$ (An) | $\Delta Q$ (L) | $\Delta Q$ (NO <sub>3</sub> ) |
|----------------------------------------------------|-----------------|----------------|-------------------------------|
| CfL(NO <sub>3</sub> ) <sub>3</sub>                 | 1.564           | 0.408          | 1.155                         |
| CmL(NO <sub>3</sub> ) <sub>3</sub>                 | 1.559           | 0.415          | 1.146                         |
| -----                                              |                 |                |                               |
| [CfL <sub>2</sub> ][NO <sub>3</sub> ] <sub>3</sub> | 1.564           | 0.672          | 0.892                         |
| [CmL <sub>2</sub> ][NO <sub>3</sub> ] <sub>3</sub> | 1.557           | 0.663          | 0.893                         |

## 4. Cartesian coordinates coordinates of optimized structures

| (1) CfL(NO <sub>3</sub> ) <sub>3</sub> |               | Standard orientation    |          |          |
|----------------------------------------|---------------|-------------------------|----------|----------|
| Center Number                          | Atomic Number | Coordinates (Angstroms) |          |          |
|                                        | Atomic Type   | X                       | Y        | Z        |
|                                        | C             | 0.48941                 | 0.64907  | 0.30150  |
|                                        | C             | -0.77507                | 1.27437  | -0.30262 |
|                                        | H             | -0.53089                | 1.95863  | -1.12903 |
|                                        | H             | -1.25681                | 1.87290  | 0.47797  |
|                                        | C             | -3.09421                | 0.68708  | -0.74295 |
|                                        | C             | -3.67432                | 0.65746  | 0.67699  |
|                                        | H             | -3.18463                | 1.68076  | -1.20386 |
|                                        | H             | -3.69092                | -0.00599 | -1.34744 |
|                                        | O             | 0.48776                 | -0.57793 | 0.54992  |
|                                        | O             | -3.10562                | -0.04489 | 1.54044  |
|                                        | C             | 1.61125                 | 2.87250  | 0.34721  |
|                                        | C             | 1.19679                 | 3.68986  | 1.58054  |
|                                        | H             | 0.98963                 | 3.14002  | -0.51121 |
|                                        | H             | 2.64349                 | 3.11171  | 0.06848  |
|                                        | C             | 1.34199                 | 5.20037  | 1.34757  |
|                                        | H             | 0.15755                 | 3.45158  | 1.84491  |
|                                        | H             | 1.81090                 | 3.38767  | 2.43902  |
|                                        | C             | 0.92983                 | 6.03159  | 2.56883  |
|                                        | H             | 2.38505                 | 5.42831  | 1.08454  |
|                                        | H             | 0.73370                 | 5.49733  | 0.48030  |
|                                        | H             | -0.11845                | 5.84847  | 2.83685  |
|                                        | H             | 1.54460                 | 5.78127  | 3.44243  |
|                                        | C             | 2.74213                 | 0.79284  | 1.19369  |
|                                        | C             | 3.72268                 | 0.21632  | 0.16406  |
|                                        | H             | 2.39755                 | 0.00969  | 1.87153  |
|                                        | H             | 3.22889                 | 1.56603  | 1.79646  |
|                                        | C             | 4.96266                 | -0.39550 | 0.831200 |
|                                        | H             | 3.20635                 | -0.55128 | -0.42638 |
|                                        | H             | 4.03150                 | 1.00917  | -0.53340 |

|   |          |          |          |
|---|----------|----------|----------|
| C | 5.95009  | -0.98760 | -0.18202 |
| H | 5.47039  | 0.37261  | 1.43272  |
| H | 4.64395  | -1.17859 | 1.53258  |
| H | 5.47803  | -1.78218 | -0.77360 |
| H | 6.31263  | -0.22056 | -0.87912 |
| N | 1.55718  | 1.41712  | 0.56460  |
| C | -5.51273 | 2.17141  | -0.03633 |
| C | -5.10781 | 3.65273  | -0.03447 |
| H | -6.57744 | 2.07691  | 0.20220  |
| H | -5.38656 | 1.73738  | -1.03211 |
| C | -5.94804 | 4.48557  | -1.01300 |
| H | -5.21686 | 4.05634  | 0.98125  |
| H | -4.04265 | 3.74065  | -0.29194 |
| C | -5.54932 | 5.96627  | -1.03076 |
| H | -5.85002 | 4.06750  | -2.02562 |
| H | -7.0103  | 4.39571  | -0.74470 |
| H | -5.66900 | 6.42044  | -0.03897 |
| H | -4.50074 | 6.09134  | -1.33037 |
| C | -5.36203 | 1.28737  | 2.31321  |
| C | -6.42129 | 0.18632  | 2.45472  |
| H | -5.79773 | 2.26957  | 2.52833  |
| H | -4.54358 | 1.11965  | 3.01590  |
| C | -7.01926 | 0.14379  | 3.86844  |
| H | -7.22517 | 0.35013  | 1.72231  |
| H | -5.96578 | -0.78241 | 2.21808  |
| C | -8.08295 | -0.94958 | 4.02675  |
| H | -6.21241 | -0.02485 | 4.59486  |
| H | -7.45795 | 1.12357  | 4.11039  |
| H | -8.91874 | -0.79315 | 3.33187  |
| H | -7.65818 | -1.94019 | 3.82581  |
| N | -4.78381 | 1.36063  | 0.95410  |
| N | -1.70307 | 0.22274  | -0.73107 |
| H | -6.16804 | 6.53444  | -1.73522 |
| H | 1.04416  | 7.10461  | 2.37460  |
| H | 6.82237  | -1.42029 | 0.32209  |

|   |          |          |          |
|---|----------|----------|----------|
| H | -8.49101 | -0.95866 | 5.04459  |
| C | -1.31413 | -0.37330 | -2.01372 |
| C | -1.85035 | -1.80788 | -2.11124 |
| H | -1.64095 | 0.24499  | -2.86158 |
| H | -0.22104 | -0.43578 | -2.05648 |
| O | -2.17533 | -2.39906 | -1.05688 |
| C | -1.54529 | -1.76121 | -4.57700 |
| C | -2.71101 | -1.07110 | -5.30035 |
| H | -1.12910 | -2.55045 | -5.21175 |
| H | -0.72950 | -1.05627 | -4.39519 |
| C | -2.29278 | -0.49220 | -6.65945 |
| H | -3.52590 | -1.79381 | -5.44247 |
| H | -3.11279 | -0.26998 | -4.66370 |
| C | -3.44588 | 0.20995  | -7.38715 |
| H | -1.46435 | 0.21681  | -6.51574 |
| H | -1.89945 | -1.30097 | -7.29154 |
| H | -4.27624 | -0.48300 | -7.57300 |
| H | -3.83648 | 1.04778  | -6.79527 |
| C | -2.41324 | -3.80100 | -3.38876 |
| C | -1.27219 | -4.82454 | -3.32024 |
| H | -2.96156 | -3.89898 | -4.33236 |
| H | -3.11771 | -3.96250 | -2.57046 |
| C | -1.78893 | -6.26635 | -3.42855 |
| H | -0.55221 | -4.63086 | -4.12889 |
| H | -0.73246 | -4.69603 | -2.37482 |
| C | -0.66356 | -7.30517 | -3.34806 |
| H | -2.51216 | -6.45022 | -2.62191 |
| H | -2.33815 | -6.38878 | -4.37417 |
| H | 0.06200  | -7.16856 | -4.16092 |
| H | -0.12319 | -7.22338 | -2.39757 |
| N | -1.93893 | -2.40249 | -3.31021 |
| H | -3.11941 | 0.60803  | -8.35502 |
| H | -1.06153 | -8.32432 | -3.42263 |
| O | 0.23504  | -2.27759 | 3.14282  |
| O | -2.95078 | -2.68128 | 3.22447  |

|    |          |          |         |
|----|----------|----------|---------|
| O  | -0.78333 | -0.36217 | 3.17955 |
| O  | 0.85223  | -0.74880 | 4.58866 |
| O  | -5.01535 | -3.40135 | 3.06107 |
| O  | -3.86696 | -2.88055 | 1.26729 |
| N  | 0.12484  | -1.11980 | 3.67250 |
| N  | -3.97960 | -3.00513 | 2.53599 |
| O  | -1.24611 | -4.46890 | 1.28336 |
| O  | 0.31833  | -5.60775 | 0.25137 |
| O  | 0.32279  | -3.41497 | 0.21927 |
| N  | -0.18175 | -4.53557 | 0.57589 |
| Cf | -1.48329 | -1.95281 | 1.30348 |

---

**(1) CmL(NO<sub>3</sub>)<sub>3</sub>**

Standard orientation

---

| Center Number Atomic<br>Number Atomic Type | Coordinates (Angstroms) |          |          |
|--------------------------------------------|-------------------------|----------|----------|
|                                            | X                       | Y        | Z        |
| C                                          | 0.48941                 | 0.64907  | 0.30150  |
| C                                          | -0.77507                | 1.27437  | -0.30262 |
| H                                          | -0.53089                | 1.95863  | -1.12903 |
| H                                          | -1.25681                | 1.87290  | 0.47797  |
| C                                          | -3.09421                | 0.68708  | -0.74295 |
| C                                          | -3.67432                | 0.65746  | 0.67699  |
| H                                          | -3.18463                | 1.68076  | -1.20386 |
| H                                          | -3.69092                | -0.00599 | -1.34744 |
| O                                          | 0.48776                 | -0.57793 | 0.54992  |
| O                                          | -3.10562                | -0.04489 | 1.54044  |
| C                                          | 1.61125                 | 2.87250  | 0.34721  |
| C                                          | 1.19679                 | 3.68986  | 1.58054  |
| H                                          | 0.98963                 | 3.14002  | -0.51121 |
| H                                          | 2.64349                 | 3.11171  | 0.06848  |
| C                                          | 1.34199                 | 5.20037  | 1.34757  |
| H                                          | 0.15755                 | 3.45158  | 1.84491  |
| H                                          | 1.81090                 | 3.38767  | 2.43902  |
| C                                          | 0.92983                 | 6.03159  | 2.56883  |



|   |          |          |          |
|---|----------|----------|----------|
| H | 2.38505  | 5.42831  | 1.08454  |
| H | 0.73370  | 5.49733  | 0.48030  |
| H | -0.11845 | 5.84847  | 2.83685  |
| H | 1.54460  | 5.78127  | 3.44243  |
| C | 2.74213  | 0.79284  | 1.19369  |
| C | 3.72268  | 0.21632  | 0.16406  |
| H | 2.39755  | 0.00969  | 1.87153  |
| H | 3.22889  | 1.56603  | 1.79646  |
| C | 4.96266  | -0.39550 | 0.83120  |
| H | 3.20635  | -0.55128 | -0.42638 |
| H | 4.03150  | 1.00917  | -0.53340 |
| C | 5.95009  | -0.98760 | -0.18202 |
| H | 5.47039  | 0.37261  | 1.43272  |
| H | 4.64395  | -1.17859 | 1.53258  |
| H | 5.47803  | -1.78218 | -0.77360 |
| H | 6.31263  | -0.22056 | -0.87912 |
| N | 1.55718  | 1.41712  | 0.56460  |
| C | -5.51273 | 2.17141  | -0.03633 |
| C | -5.10781 | 3.65273  | -0.03447 |
| H | -6.57744 | 2.07691  | 0.20220  |
| H | -5.38656 | 1.73738  | -1.03211 |
| C | -5.94804 | 4.48557  | -1.01300 |
| H | -5.21686 | 4.05634  | 0.98125  |
| H | -4.04265 | 3.74065  | -0.29194 |
| C | -5.54932 | 5.96627  | -1.03076 |
| H | -5.85002 | 4.06750  | -2.02562 |
| H | -7.01030 | 4.39571  | -0.74470 |
| H | -5.66900 | 6.42044  | -0.03897 |
| H | -4.50074 | 6.09134  | -1.33037 |
| C | -5.36203 | 1.28737  | 2.31321  |
| C | -6.42129 | 0.18632  | 2.45472  |
| H | -5.79773 | 2.26957  | 2.52833  |
| H | -4.54358 | 1.11965  | 3.01590  |
| C | -7.01926 | 0.14379  | 3.86844  |
| H | -7.22517 | 0.35013  | 1.72231  |

|   |          |          |          |
|---|----------|----------|----------|
| H | -5.96578 | -0.78241 | 2.21808  |
| C | -8.08295 | -0.94958 | 4.02675  |
| H | -6.21241 | -0.02485 | 4.59486  |
| H | -7.45795 | 1.12357  | 4.11039  |
| H | -8.91874 | -0.79315 | 3.33187  |
| H | -7.65818 | -1.94019 | 3.82581  |
| N | -4.78381 | 1.36063  | 0.95410  |
| N | -1.70307 | 0.22274  | -0.73107 |
| H | -6.16804 | 6.53444  | -1.73522 |
| H | 1.04416  | 7.10461  | 2.37460  |
| H | 6.82237  | -1.42029 | 0.32209  |
| H | -8.49101 | -0.95866 | 5.04459  |
| C | -1.31413 | -0.37330 | -2.01372 |
| C | -1.85035 | -1.80788 | -2.11124 |
| H | -1.64095 | 0.24499  | -2.86158 |
| H | -0.22104 | -0.43578 | -2.05648 |
| O | -2.17533 | -2.39906 | -1.05688 |
| C | -1.54529 | -1.76121 | -4.57700 |
| C | -2.71101 | -1.07110 | -5.30035 |
| H | -1.12910 | -2.55045 | -5.21175 |
| H | -0.72950 | -1.05627 | -4.39519 |
| C | -2.29278 | -0.49220 | -6.65945 |
| H | -3.52590 | -1.79381 | -5.44247 |
| H | -3.11279 | -0.26998 | -4.66370 |
| C | -3.44588 | 0.20995  | -7.38715 |
| H | -1.46435 | 0.21681  | -6.51574 |
| H | -1.89945 | -1.30097 | -7.29154 |
| H | -4.27624 | -0.48300 | -7.57300 |
| H | -3.83648 | 1.04778  | -6.79527 |
| C | -2.41324 | -3.80100 | -3.38876 |
| C | -1.27219 | -4.82454 | -3.32024 |
| H | -2.96156 | -3.89898 | -4.33236 |
| H | -3.11771 | -3.96250 | -2.57046 |
| C | -1.78893 | -6.26635 | -3.42855 |
| H | -0.55221 | -4.63086 | -4.12889 |

|    |          |          |          |
|----|----------|----------|----------|
| H  | -0.73246 | -4.69603 | -2.37482 |
| C  | -0.66356 | -7.30517 | -3.34806 |
| H  | -2.51216 | -6.45022 | -2.62191 |
| H  | -2.33815 | -6.38878 | -4.37417 |
| H  | 0.06200  | -7.16856 | -4.16092 |
| H  | -0.12319 | -7.22338 | -2.39757 |
| N  | -1.93893 | -2.40249 | -3.31021 |
| H  | -3.11941 | 0.60803  | -8.35502 |
| H  | -1.06153 | -8.32432 | -3.42263 |
| O  | 0.23504  | -2.27759 | 3.14282  |
| O  | -2.95078 | -2.68128 | 3.22447  |
| O  | -0.78333 | -0.36217 | 3.17955  |
| O  | 0.85223  | -0.74880 | 4.58866  |
| O  | -5.01535 | -3.40135 | 3.06107  |
| O  | -3.86696 | -2.88055 | 1.26729  |
| N  | 0.12484  | -1.11980 | 3.67250  |
| N  | -3.97960 | -3.00513 | 2.53599  |
| O  | -1.24611 | -4.46890 | 1.28336  |
| O  | 0.31833  | -5.60775 | 0.25137  |
| O  | 0.32279  | -3.41497 | 0.21927  |
| N  | -0.18175 | -4.53557 | 0.57589  |
| Cm | -1.48329 | -1.95281 | 1.30348  |

---

**(1) [CfL<sub>2</sub>][NO<sub>3</sub>]<sub>3</sub>**

Standard orientation

---

Center Number Atomic  
Number Atomic Type

Coordinates (Angstroms)

|    | X        | Y        | Z        |
|----|----------|----------|----------|
| Cf | -1.74020 | -1.99121 | 1.34296  |
| C  | 0.21650  | 0.64762  | 0.90474  |
| C  | -1.22507 | 0.87164  | 0.40794  |
| H  | -1.23070 | 1.64923  | -0.32546 |
| H  | -1.84630 | 1.15337  | 1.23242  |
| C  | -3.11401 | -0.15048 | -0.66899 |
| C  | -4.00950 | 0.25313  | 0.51718  |

|   |          |          |          |
|---|----------|----------|----------|
| H | -3.11781 | 0.63012  | -1.40148 |
| H | -3.48849 | -1.05287 | -1.10627 |
| O | 0.57619  | -0.49257 | 1.29843  |
| O | -3.74383 | -0.16648 | 1.67338  |
| C | 0.66153  | 3.00141  | 0.46538  |
| C | 0.11087  | 3.80144  | 1.66260  |
| H | -0.10291 | 2.89996  | -0.27672 |
| H | 1.49914  | 3.51893  | 0.04628  |
| C | -0.33621 | 5.19730  | 1.18758  |
| H | -0.72605 | 3.28372  | 2.08278  |
| H | 0.87546  | 3.90505  | 2.40343  |
| C | -0.88643 | 5.99510  | 2.38493  |
| H | 0.50029  | 5.71630  | 0.76689  |
| H | -1.10047 | 5.09358  | 0.44662  |
| H | -1.72220 | 5.47604  | 2.80574  |
| H | -0.12141 | 6.09959  | 3.12592  |
| C | 2.46658  | 1.45253  | 1.37752  |
| C | 3.35051  | 1.05443  | 0.18040  |
| H | 2.48191  | 0.67094  | 2.10805  |
| H | 2.84085  | 2.35531  | 1.81249  |
| C | 4.79668  | 0.82831  | 0.66058  |
| H | 2.97450  | 0.15232  | -0.25583 |
| H | 3.33496  | 1.83663  | -0.54952 |
| C | 5.67890  | 0.42944  | -0.53691 |
| H | 5.17288  | 1.73013  | 1.09608  |
| H | 4.81230  | 0.04598  | 1.39066  |
| H | 5.30212  | -0.47236 | -0.97301 |
| H | 5.66413  | 1.21160  | -1.26684 |
| N | 1.08615  | 1.66657  | 0.91628  |
| C | -5.38882 | 1.53386  | -1.03088 |
| C | -4.67143 | 2.87459  | -1.28060 |
| H | -6.44577 | 1.67439  | -1.11936 |
| H | -5.06227 | 0.81545  | -1.75375 |
| C | -5.00245 | 3.37907  | -2.69884 |
| H | -4.99994 | 3.59448  | -0.56027 |

|   |          |          |          |
|---|----------|----------|----------|
| H | -3.61451 | 2.73558  | -1.18983 |
| C | -4.28420 | 4.71811  | -2.94839 |
| H | -4.67382 | 2.65951  | -3.41854 |
| H | -6.06007 | 3.51834  | -2.79104 |
| H | -4.61317 | 5.43840  | -2.22925 |
| H | -3.22697 | 4.57866  | -2.85599 |
| C | -5.91399 | 1.42962  | 1.46366  |
| C | -7.03418 | 0.38827  | 1.64601  |
| H | -6.34626 | 2.39150  | 1.28276  |
| H | -5.31674 | 1.46785  | 2.35098  |
| C | -7.91325 | 0.78547  | 2.84696  |
| H | -7.63402 | 0.35040  | 0.76073  |
| H | -6.60094 | -0.57365 | 1.82454  |
| C | -9.03249 | -0.25636 | 3.03249  |
| H | -7.31210 | 0.82376  | 3.73163  |
| H | -8.34710 | 1.74672  | 2.66857  |
| H | -9.63404 | -0.29540 | 2.14827  |
| H | -8.59844 | -1.21806 | 3.21145  |
| N | -5.06961 | 1.04720  | 0.32139  |
| N | -1.73987 | -0.36979 | -0.19171 |
| H | -4.51274 | 5.06734  | -3.93386 |
| H | -1.19789 | 6.96447  | 2.05497  |
| H | 6.68318  | 0.27157  | -0.20330 |
| H | -9.64272 | 0.02045  | 3.86712  |
| C | -0.88403 | -0.75762 | -1.32371 |
| C | -1.41935 | -2.05934 | -1.95183 |
| H | -0.89004 | 0.02209  | -2.05668 |
| H | 0.11656  | -0.91505 | -0.97878 |
| O | -2.01947 | -2.90438 | -1.23802 |
| C | -0.54999 | -1.30759 | -4.09669 |
| C | -1.57232 | -0.31067 | -4.67752 |
| H | -0.04935 | -1.81123 | -4.89709 |
| H | 0.16630  | -0.77786 | -3.50437 |
| C | -0.84181 | 0.72516  | -5.55537 |
| H | -2.28889 | -0.83957 | -5.27162 |

|   |          |          |          |
|---|----------|----------|----------|
| H | -2.07372 | 0.19195  | -3.87754 |
| C | -1.86366 | 1.72457  | -6.13063 |
| H | -0.12464 | 1.25283  | -4.96284 |
| H | -0.34163 | 0.22383  | -6.35830 |
| H | -2.58233 | 1.19922  | -6.72332 |
| H | -2.36158 | 2.22675  | -5.32778 |
| C | -1.75097 | -3.54178 | -3.85011 |
| C | -0.66165 | -4.62710 | -3.76654 |
| H | -2.00709 | -3.37198 | -4.87500 |
| H | -2.61895 | -3.86660 | -3.31500 |
| C | -1.18828 | -5.93120 | -4.39575 |
| H | 0.20823  | -4.30135 | -4.29741 |
| H | -0.40920 | -4.80173 | -2.74121 |
| C | -0.10069 | -7.01899 | -4.31499 |
| H | -2.05830 | -6.25721 | -3.86489 |
| H | -1.44028 | -5.75566 | -5.42053 |
| H | 0.77050  | -6.69316 | -4.84457 |
| H | 0.15035  | -7.19661 | -3.29024 |
| N | -1.24589 | -2.29436 | -3.25677 |
| H | -1.35585 | 2.44309  | -6.73997 |
| H | -0.46760 | -7.92323 | -4.75458 |
| C | 0.22396  | -4.61786 | 1.81259  |
| C | -1.22229 | -4.85179 | 2.28869  |
| H | -1.23318 | -5.62860 | 3.02431  |
| H | -1.82952 | -5.14037 | 1.45691  |
| C | -3.13277 | -3.83713 | 3.33442  |
| C | -4.00882 | -4.24447 | 2.13497  |
| H | -3.14419 | -4.61786 | 4.06726  |
| H | -3.51752 | -2.93676 | 3.76601  |
| O | 0.58119  | -3.47491 | 1.42658  |
| O | -3.73025 | -3.82296 | 0.98279  |
| C | 0.67876  | -6.96784 | 2.25374  |
| C | 0.15090  | -7.76751 | 1.04729  |
| H | -0.09701 | -6.87266 | 2.98500  |
| H | 1.51320  | -7.48115 | 2.68378  |

|   |          |           |          |
|---|----------|-----------|----------|
| C | -0.29710 | -9.16379  | 1.51649  |
| H | -0.68159 | -7.25320  | 0.61390  |
| H | 0.92712  | -7.86741  | 0.31802  |
| C | -0.82552 | -9.96692  | 0.31343  |
| H | 0.53498  | -9.67801  | 1.95093  |
| H | -1.07335 | -9.06181  | 2.24514  |
| H | -1.65757 | -9.45308  | -0.12116 |
| H | -0.04927 | -10.06920 | -0.41590 |
| C | 2.48450  | -5.40668  | 1.36753  |
| C | 3.34951  | -5.00090  | 2.57498  |
| H | 2.50403  | -4.62588  | 0.63626  |
| H | 2.87079  | -6.30706  | 0.93866  |
| C | 4.80181  | -4.76893  | 2.11597  |
| H | 2.96281  | -4.09946  | 3.00338  |
| H | 3.32759  | -5.78141  | 3.30632  |
| C | 5.66161  | -4.36751  | 3.32824  |
| H | 5.18881  | -5.66917  | 1.68626  |
| H | 4.82635  | -3.98661  | 1.38607  |
| H | 5.27425  | -3.46720  | 3.75779  |
| H | 5.63675  | -5.15033  | 4.05716  |
| N | 1.10055  | -5.63036  | 1.81071  |
| C | -5.40461 | -5.53303  | 3.66052  |
| C | -4.68163 | -6.86867  | 3.92196  |
| H | -6.46201 | -5.68110  | 3.73175  |
| H | -5.09503 | -4.81222  | 4.38771  |
| C | -5.02942 | -7.37468  | 5.33575  |
| H | -4.99424 | -7.59104  | 3.19765  |
| H | -3.62395 | -6.72236  | 3.84672  |
| C | -4.30763 | -8.71030  | 5.59489  |
| H | -4.71408 | -6.65322  | 6.05975  |
| H | -6.08723 | -7.51947  | 5.41384  |
| H | -4.62432 | -9.43240  | 4.87163  |
| H | -3.24998 | -8.56606  | 5.51544  |
| C | -5.89158 | -5.42968  | 1.15958  |
| C | -7.01430 | -4.39495  | 0.96193  |

|   |          |           |          |
|---|----------|-----------|----------|
| H | -6.32107 | -6.39431  | 1.33298  |
| H | -5.28092 | -5.46366  | 0.28116  |
| C | -7.87295 | -4.79907  | -0.24982 |
| H | -7.62671 | -4.36011  | 1.83862  |
| H | -6.58444 | -3.43037  | 0.78901  |
| C | -8.99569 | -3.76503  | -0.45174 |
| H | -7.25926 | -4.83467  | -1.12599 |
| H | -8.30265 | -5.76302  | -0.07602 |
| H | -9.60842 | -3.72807  | 0.42486  |
| H | -8.56542 | -2.80111  | -0.62744 |
| N | -5.06706 | -5.04413  | 2.31417  |
| N | -1.75285 | -3.61248  | 2.87738  |
| H | -4.54677 | -9.06066  | 6.57739  |
| H | -1.13689 | -10.93660 | 0.64140  |
| H | 6.67132  | -4.20608  | 3.01233  |
| H | -9.59353 | -4.04778  | -1.2933  |
| C | -0.91491 | -3.21795  | 4.02034  |
| C | -1.46665 | -1.91862  | 4.63849  |
| H | -0.92634 | -3.99698  | 4.75479  |
| H | 0.08968  | -3.05567  | 3.68869  |
| O | -2.06040 | -1.07872  | 3.91343  |
| C | -0.62475 | -2.66362  | 6.79682  |
| C | -1.64994 | -3.66629  | 7.36189  |
| H | -0.13938 | -2.15695  | 7.60400  |
| H | 0.10423  | -3.18913  | 6.21506  |
| C | -0.92640 | -4.69731  | 8.25049  |
| H | -2.37857 | -3.14115  | 7.94439  |
| H | -2.13592 | -4.17160  | 6.55406  |
| C | -1.95013 | -5.70231  | 8.81207  |
| H | -0.19814 | -5.22075  | 7.66796  |
| H | -0.44059 | -4.19242  | 9.05974  |
| H | -2.67930 | -5.18102  | 9.39555  |
| H | -2.43531 | -6.20675  | 8.00259  |
| C | -1.83528 | -0.43719  | 6.53353  |
| C | -0.75160 | 0.65490   | 6.46565  |



|   |          |          |         |
|---|----------|----------|---------|
| H | -2.10441 | -0.61003 | 7.55467 |
| H | -2.69823 | -0.11777 | 5.98677 |
| C | -1.29379 | 1.95544  | 7.08799 |
| H | 0.11278  | 0.33355  | 7.00789 |
| H | -0.48647 | 0.83132  | 5.44381 |
| C | -0.21089 | 3.04892  | 7.02232 |
| H | -2.15833 | 2.27651  | 6.54518 |
| H | -1.55897 | 1.77809  | 8.10909 |
| H | 0.65399  | 2.72859  | 7.56515 |
| H | 0.05460  | 3.22674  | 6.00133 |
| N | -1.31423 | -1.68117 | 5.94642 |
| H | -1.44623 | -6.41817 | 9.42731 |
| H | -0.58916 | 3.95153  | 7.45508 |

---

**(1) [CmL<sub>2</sub>][NO<sub>3</sub>]<sub>3</sub>**

Standard orientation

---

| Center Number Atomic<br>Number Atomic Type | Coordinates (Angstroms) |          |          |
|--------------------------------------------|-------------------------|----------|----------|
|                                            | X                       | Y        | Z        |
| C                                          | 0.20718                 | 0.67143  | 0.87471  |
| C                                          | -1.22612                | 0.91022  | 0.37066  |
| H                                          | -1.22282                | 1.68659  | -0.36565 |
| H                                          | -1.85206                | 1.20391  | 1.19027  |
| C                                          | -3.11202                | -0.11932 | -0.70009 |
| C                                          | -4.00184                | 0.27112  | 0.49478  |
| H                                          | -3.12393                | 0.66528  | -1.42841 |
| H                                          | -3.48300                | -1.01964 | -1.14278 |
| O                                          | 0.55317                 | -0.47337 | 1.26315  |
| O                                          | -3.72224                | -0.15106 | 1.64594  |
| C                                          | 0.66406                 | 3.01354  | 0.45858  |
| C                                          | 0.11134                 | 3.80147  | 1.65945  |
| H                                          | -0.09728                | 2.91795  | -0.28623 |
| H                                          | 1.50346                 | 3.53425  | 0.04630  |
| 0C                                         | -0.33440                | 5.19700  | 1.18892  |
| H                                          | -0.72573                | 3.28024  | 2.07496  |

|   |          |          |          |
|---|----------|----------|----------|
| H | 0.87406  | 3.90085  | 2.40321  |
| C | -0.88512 | 5.99267  | 2.38572  |
| H | 0.50255  | 5.71579  | 0.77044  |
| H | -1.09822 | 5.09460  | 0.44648  |
| H | -1.72215 | 5.47393  | 2.80439  |
| H | -0.12122 | 6.09461  | 3.12778  |
| C | 2.45897  | 1.45488  | 1.37153  |
| C | 3.34754  | 1.05436  | 0.17894  |
| H | 2.46531  | 0.67193  | 2.10049  |
| H | 2.83645  | 2.35451  | 1.81202  |
| C | 4.79209  | 0.82793  | 0.66340  |
| H | 2.97198  | 0.15259  | -0.25779 |
| H | 3.33639  | 1.83624  | -0.55145 |
| C | 5.67647  | 0.42978  | -0.53336 |
| H | 5.16744  | 1.72943  | 1.09980  |
| H | 4.80593  | 0.04537  | 1.39324  |
| H | 5.30138  | -0.47274 | -0.96967 |
| H | 5.66142  | 1.21166  | -1.26350 |
| N | 1.08258  | 1.67910  | 0.90065  |
| C | -5.39329 | 1.53718  | -1.03440 |
| C | -4.67319 | 2.87383  | -1.28200 |
| H | -6.45020 | 1.67794  | -1.11986 |
| H | -5.07002 | 0.81804  | -1.75820 |
| C | -5.00505 | 3.37863  | -2.69716 |
| H | -4.99785 | 3.59347  | -0.55995 |
| H | -3.61606 | 2.73177  | -1.19303 |
| C | -4.28555 | 4.71670  | -2.94594 |
| H | -4.67851 | 2.65905  | -3.41793 |
| H | -6.06199 | 3.51957  | -2.78668 |
| H | -4.61191 | 5.43646  | -2.22450 |
| H | -3.22861 | 4.57592  | -2.85607 |
| C | -5.91194 | 1.43108  | 1.45838  |
| C | -7.03184 | 0.38870  | 1.64207  |
| H | -6.34593 | 2.39245  | 1.28004  |
| H | -5.31246 | 1.46858  | 2.34408  |

|   |          |          |          |
|---|----------|----------|----------|
| C | -7.91179 | 0.78682  | 2.84252  |
| H | -7.63189 | 0.35036  | 0.75701  |
| H | -6.59811 | -0.57289 | 1.82096  |
| C | -9.03124 | -0.25470 | 3.02790  |
| H | -7.31102 | 0.82586  | 3.72758  |
| H | -8.34546 | 1.74836  | 2.66349  |
| H | -9.63213 | -0.29380 | 2.14366  |
| H | -8.59748 | -1.21629 | 3.20742  |
| N | -5.06861 | 1.05512  | 0.31244  |
| N | -1.73817 | -0.33310 | -0.22473 |
| H | -4.51630 | 5.06790  | -3.92976 |
| H | -1.19470 | 6.96232  | 2.05641  |
| H | 6.68057  | 0.27315  | -0.19873 |
| H | -9.64167 | 0.02230  | 3.86214  |
| C | -0.88113 | -0.72351 | -1.35241 |
| C | -1.41593 | -2.03247 | -1.96259 |
| H | -0.89203 | 0.04946  | -2.09306 |
| H | 0.12208  | -0.87033 | -1.00794 |
| O | -2.01564 | -2.86395 | -1.23227 |
| C | -0.54607 | -1.30425 | -4.10301 |
| C | -1.56889 | -0.30972 | -4.67794 |
| H | -0.04702 | -1.80939 | -4.90318 |
| H | 0.17381  | -0.77555 | -3.51259 |
| C | -0.83995 | 0.72341  | -5.55465 |
| H | -2.28702 | -0.83805 | -5.26952 |
| H | -2.06798 | 0.19263  | -3.87574 |
| C | -1.86284 | 1.71940  | -6.13024 |
| H | -0.12295 | 1.25145  | -4.96215 |
| H | -0.34004 | 0.22136  | -6.35667 |
| H | -2.58030 | 1.19125  | -6.72310 |
| H | -2.36297 | 2.22073  | -5.32813 |
| C | -1.74911 | -3.53385 | -3.85308 |
| C | -0.66091 | -4.62216 | -3.77042 |
| H | -2.00493 | -3.36484 | -4.87798 |
| H | -2.61641 | -3.85655 | -3.31631 |

|   |          |          |          |
|---|----------|----------|----------|
| C | -1.18997 | -5.92788 | -4.39472 |
| H | 0.20795  | -4.29889 | -4.30511 |
| H | -0.40549 | -4.79438 | -2.74586 |
| C | -0.10149 | -7.01485 | -4.31252 |
| H | -2.05892 | -6.25216 | -3.86059 |
| H | -1.44502 | -5.75603 | -5.41951 |
| H | 0.76727  | -6.69102 | -4.84624 |
| H | 0.15306  | -7.18756 | -3.28763 |
| N | -1.24385 | -2.28344 | -3.26353 |
| H | -1.35645 | 2.43814  | -6.73977 |
| H | -0.46915 | -7.92163 | -4.74605 |
| C | 0.21528  | -4.63648 | 1.83465  |
| C | -1.22405 | -4.88310 | 2.31747  |
| H | -1.22707 | -5.66147 | 3.05264  |
| H | -1.83647 | -5.17491 | 1.48937  |
| C | -3.13072 | -3.86971 | 3.36549  |
| C | -4.00067 | -4.26313 | 2.15733  |
| H | -3.14651 | -4.65419 | 4.09188  |
| H | -3.51439 | -2.97135 | 3.80789  |
| O | 0.56099  | -3.48946 | 1.45161  |
| O | -3.70542 | -3.83654 | 1.01108  |
| C | 0.67929  | -6.97674 | 2.26027  |
| C | 0.14841  | -7.76961 | 1.05237  |
| H | -0.09324 | -6.88485 | 2.99399  |
| H | 1.51578  | -7.49185 | 2.68505  |
| C | -0.29588 | -9.16818 | 1.51663  |
| H | -0.68590 | -7.25386 | 0.62483  |
| H | 0.92223  | -7.86491 | 0.31976  |
| C | -0.82472 | -9.96603 | 0.31107  |
| H | 0.53785  | -9.68259 | 1.94699  |
| H | -1.07094 | -9.07076 | 2.24793  |
| H | -1.65806 | -9.45116 | -0.11963 |
| H | -0.04928 | -10.0633 | -0.41960 |
| C | 2.47847  | -5.40841 | 1.37271  |
| C | 3.34686  | -5.00411 | 2.57873  |

|   |          |          |          |
|---|----------|----------|----------|
| H | 2.49192  | -4.62503 | 0.64411  |
| H | 2.86714  | -6.30592 | 0.93745  |
| C | 4.79719  | -4.76955 | 2.11575  |
| H | 2.96002  | -4.10480 | 3.01045  |
| H | 3.32907  | -5.78664 | 3.30850  |
| C | 5.66234  | -4.36576 | 3.32467  |
| H | 5.18402  | -5.66911 | 1.68519  |
| H | 4.81714  | -3.98716 | 1.38599  |
| H | 5.27606  | -3.46512 | 3.75512  |
| H | 5.64183  | -5.14720 | 4.05502  |
| N | 1.09651  | -5.63978 | 1.82288  |
| C | -5.40617 | -5.53587 | 3.66600  |
| C | -4.68308 | -6.86893 | 3.92371  |
| H | -6.46328 | -5.68182 | 3.73643  |
| H | -5.09653 | -4.81530 | 4.39443  |
| C | -5.03277 | -7.37553 | 5.33372  |
| H | -4.99398 | -7.59012 | 3.19702  |
| H | -3.62556 | -6.72172 | 3.84965  |
| C | -4.30884 | -8.70919 | 5.59304  |
| H | -4.72110 | -6.65405 | 6.05909  |
| H | -6.09000 | -7.52283 | 5.40774  |
| H | -4.61986 | -9.43081 | 4.86681  |
| H | -3.25152 | -8.56172 | 5.51892  |
| C | -5.88966 | -5.43355 | 1.16587  |
| C | -7.0129  | -4.39751 | 0.96550  |
| H | -6.32069 | -6.39740 | 1.33858  |
| H | -5.27716 | -5.46822 | 0.28887  |
| C | -7.87400 | -4.80044 | -0.24756 |
| H | -7.62583 | -4.36245 | 1.84175  |
| H | -6.58205 | -3.43372 | 0.79235  |
| C | -8.99669 | -3.76509 | -0.44886 |
| H | -7.26051 | -4.83617 | -1.12401 |
| H | -8.30481 | -5.76451 | -0.07475 |
| H | -9.61056 | -3.72980 | 0.42662  |
| H | -8.56584 | -2.80095 | -0.62166 |

|   |          |           |          |
|---|----------|-----------|----------|
| N | -5.06525 | -5.05251  | 2.32361  |
| N | -1.75126 | -3.64654  | 2.90850  |
| H | -4.55193 | -9.06192  | 6.57330  |
| H | -1.13419 | -10.93750 | 0.63484  |
| H | 6.67021  | -4.20337  | 3.00393  |
| H | -9.59336 | -4.04515  | -1.29195 |
| C | -0.91349 | -3.25275  | 4.05075  |
| C | -1.46416 | -1.94623  | 4.65220  |
| H | -0.93213 | -4.02514  | 4.79262  |
| H | 0.09381  | -3.09943  | 3.72400  |
| O | -2.05695 | -1.11772  | 3.91464  |
| C | -0.62068 | -2.66773  | 6.80498  |
| C | -1.64588 | -3.66786  | 7.36502  |
| H | -0.13560 | -2.16001  | 7.61206  |
| H | 0.11035  | -3.19210  | 6.22448  |
| C | -0.92385 | -4.69706  | 8.25158  |
| H | -2.37530 | -3.14364  | 7.94613  |
| H | -2.13065 | -4.17268  | 6.55545  |
| C | -1.94958 | -5.69847  | 8.81187  |
| H | -0.19542 | -5.22093  | 7.66924  |
| H | -0.43819 | -4.19224  | 9.06050  |
| H | -2.67880 | -5.17392  | 9.39349  |
| H | -2.43478 | -6.20265  | 8.00237  |
| C | -1.83311 | -0.44475  | 6.53635  |
| C | -0.74972 | 0.64957   | 6.46912  |
| H | -2.10329 | -0.61420  | 7.55739  |
| H | -2.69373 | -0.12731  | 5.98626  |
| C | -1.29522 | 1.95198   | 7.08558  |
| H | 0.11301  | 0.33111   | 7.01634  |
| H | -0.48037 | 0.82294   | 5.44818  |
| C | -0.21209 | 3.04517   | 7.01960  |
| H | -2.15829 | 2.27133   | 6.53885  |
| H | -1.56423 | 1.77806   | 8.10634  |
| H | 0.65103  | 2.72567   | 7.56496  |
| H | 0.05563  | 3.22058   | 5.99854  |

|    |          |          |         |
|----|----------|----------|---------|
| N  | -1.31226 | -1.69301 | 5.95545 |
| H  | -1.44849 | -6.41403 | 9.42912 |
| H  | -0.59102 | 3.94923  | 7.44903 |
| Cm | -1.73763 | -1.98777 | 1.34437 |
